# Supplementary material for: PMMA functionalized boron nitride sheets as nanofillers
Source: Royal Society of Chemistry journal article supplement (doi:10.1039/c5nr00936g), 2015-01-01
Supplement: c5nr00936g1.pdf [file c5nr00936g1.pdf]

## Supporting Information

### PMMA functionalized boron nitride sheets as nanofillers

Zhenhua Cui,<sup>a</sup> Andre Martinez<sup>b</sup> and Douglas H. Adamson<sup>\*a,b</sup>

<sup>a</sup>Institute of Materials Science, Polymer Program, University of Connecticut, Storrs, CT 06269. E-mail: adamson@uconn.edu

<sup>b</sup>Department of Chemistry University of Connecticut, Storrs, CT 06269

#### **Materials**

Hexagonal boron nitride powder (UK Abrasives, Inc.), Methylene di-p-phenyl diisocyanate (MDI) (Acros organics, 98%),  $\alpha$ -bromoisobutyryl bromide (BiBB) (Acros, 98%), copper (I) bromide (Strem Chemicals, 98%), copper (II) bromide (Fisher, reagent grade), 4-dimethylaminopyridine (DMAP) (Aldrich, 99%), dimethylformamide (DMF) (Fisher, certified ACS grade), N,N,N',N'',N''-pentamethyldiethylenetriamine (PMDETA) (Aldrich, 99+%), methanol (Aldrich, 99.8%), and tetrahydrofuran (THF) (Fisher, histological grade) were used without further purification. Acetone (Fisher, histological grade) was dried with CaSO<sub>4</sub> then distilled and stored over 3 Å molecular sieves. Methyl methacrylate (Aldrich, 99%) was rinsed three times with 5% wt. NaOH<sub>(aq)</sub> to remove monomethyl ether hydroquinone, three times with distilled water to remove NaOH, then dried with CaCl<sub>2</sub>, distilled under reduced pressure, and stored over CaH<sub>2</sub> at -32°C. 1-methyl-2-pyrrolidinone (NMP) (Fisher, laboratory grade) was dried with CaH<sub>2</sub> then distilled under reduced pressure. Triethylamine (Acros, 99%) was dried with CaSO<sub>4</sub>, distilled under reduced pressure, and then stored over CaH<sub>2</sub>.

## **Synthesis**

### **Preparation of hydroxylated hBN (BNO)**

BNO was prepared by the thermal treatment of hexagonal boron nitride in air. In a typical experimental run, 20 g BN powder was placed in a quartz tube in a tube furnace. The furnace was heated to 1000 °C and held at that temperature for two hours in air. After cooling, the material was washed with hot water and spray dried.

### **Synthesis of Isocyanate functionalized BNO (fBNO)**

800mg BNO and 31g MDI were added into 100ml flask, 3 drops of triethylamine was then added as catalyst. The mixture was heated up to 120°C to react overnight. After reaction is over, white powder was obtained by vacuum filtration, rinsed three times with dichloromethane and dried under vacuum.

### **Synthesis of Amine fBNO**

700mg Isocyanate fBNO was dispersed into about 5ml DMF then added drop-wise while stirring to approximately 100ml distilled water at room temperature. The mixture was degassed to promote isocyanate hydrolysis and allowed to stir overnight. The white powder was collected by vacuum filtration, rinsed several times with acetone and dried under vacuum.

## **Instruments**

FESEM measurements were performed using a JEOL JSM-6335F cold cathode field emission (12 kV) scanning electron microscope. TGA was carried out on a TA Instruments Q 500 Thermogravimetric Analyzer at a heating rate of 10 °C min<sup>-1</sup> in a platinum pan. IR transmission measurements were conducted on a Nicolet 560 instrument coupled with SpectraTech IR Plan 0044-003 microscope. Gel permeation chromatography (GPC) was performed using a Waters 717 plus autosampler with THF as eluent, a Waters 1515 isocratic HPLC pump, a Jordi fash gel DVB column, and a Varian 380-LC ELS detector. The thin film sample thickness was determined using a thickness gauge (Model LE1000-2, MeasureItAll) as the average of three data points. The composites were hot pressed into sheets and then cut into dog-bone shapes for mechanical tests. Five samples of each composite were prepared and tested. Tensile tests were performed on a computer interfaced Instron-1011 with a 500 N load cell at room temperature. The rate of crosshead motion was 1 mm/min with the data acquisition rate of 10 points per second.

## **FTIR**

FTIR of reaction intermediates were performed to confirm reactions.

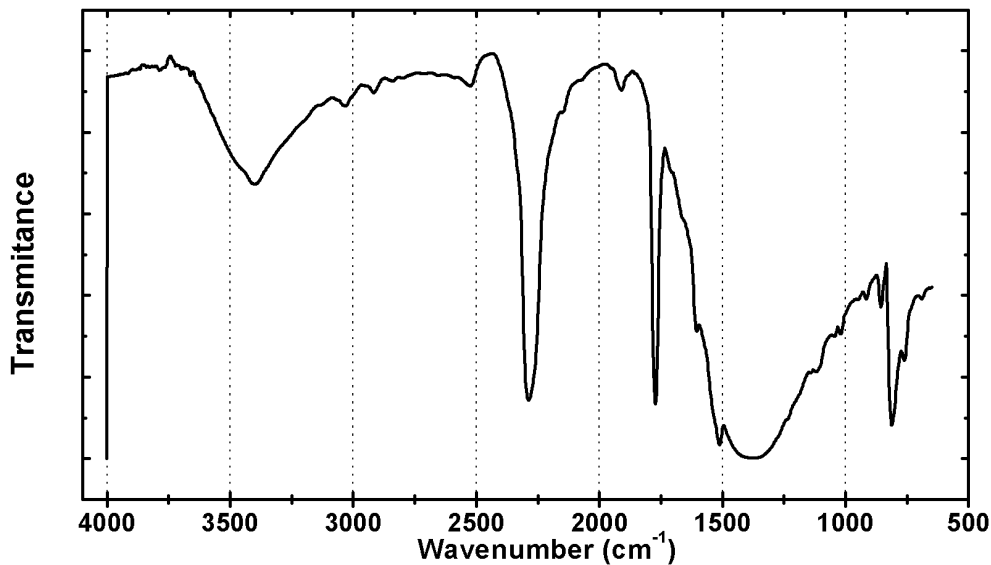

**Figure S1.** FTIR of amine functionalized BNNS

Figure S1 shows a peak at 3400 cm<sup>-1</sup> arising from N-H bonds. Peaks at 1770 cm<sup>-1</sup> and 1610 cm<sup>-1</sup> correspond to C=O of the carbamate and urea respectively. A small peak at 1510 cm<sup>-1</sup> from the benzene ring can be seen but overlaps with the broad B-N in-plane stretching peak at 1375 cm<sup>-1</sup>. A peak centered at 2250 cm<sup>-1</sup> corresponds to the N=C=O stretch of unreacted isocyanate. The B-N-B out of plane bending peak can be found at 819 cm<sup>-1</sup>.

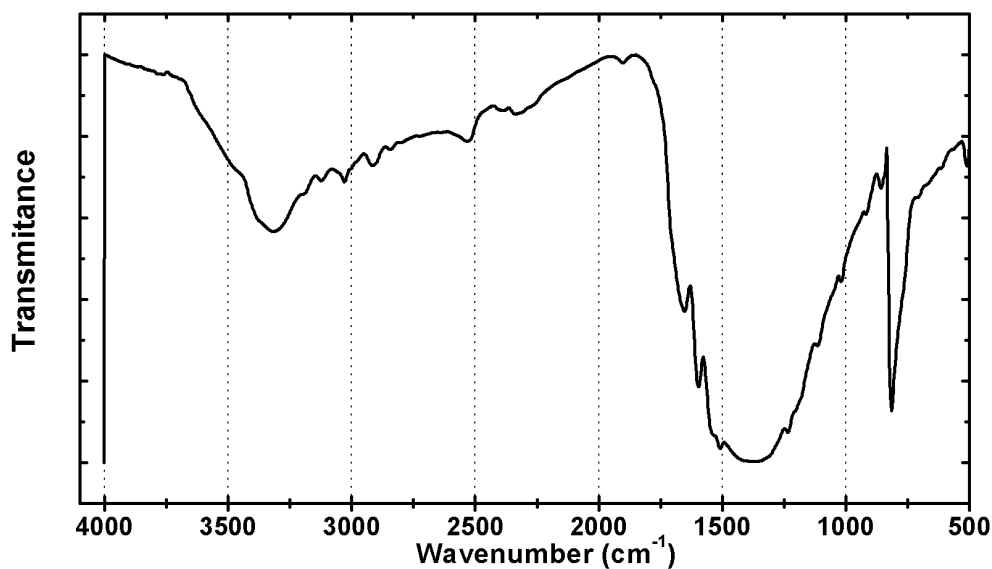

**Figure S2.** FTIR of BiBB functionalized BNNS

After the reaction with the acid bromide BiBB, followed by multiple washing, the FTIR in figure S2 confirms reaction with BiBB. The large peak at  $1770\text{ cm}^{-1}$  remains, but has greatly decreased in area due to washing out unattached carbamates. A new peak at  $1663\text{ cm}^{-1}$  shows the carbonyl stretching of the C=O in the BiBB initiator. The presence of the small peak at  $1610\text{ cm}^{-1}$  suggests that the linkage between BN sheets and initiator may contain more than one MDI molecule, with a urea linkage between them.

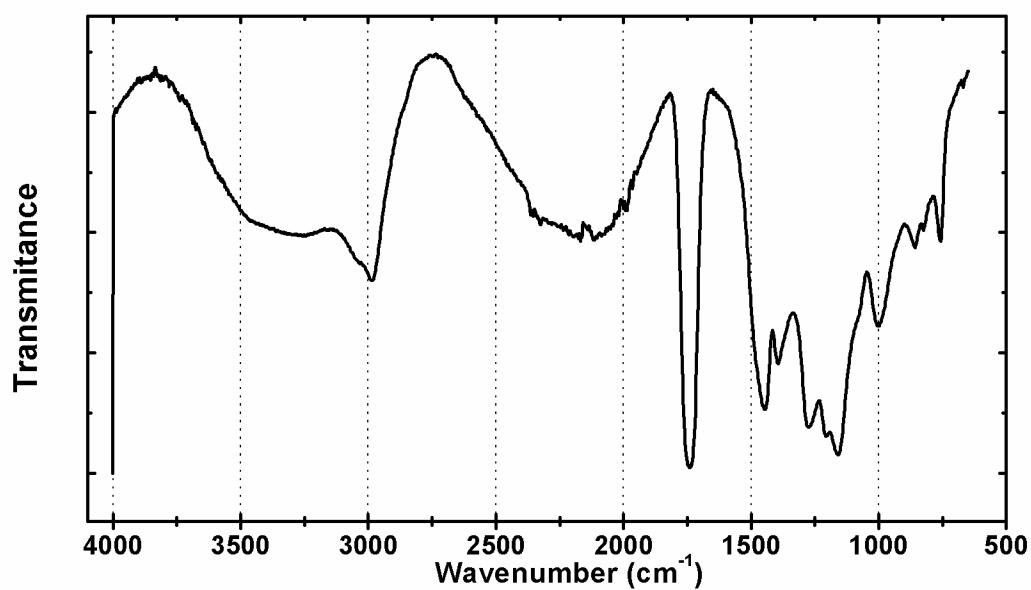

**Figure S3.** FTIR of free polymer in the filtrate, which is almost identical with the spectrum of neat PMMA.

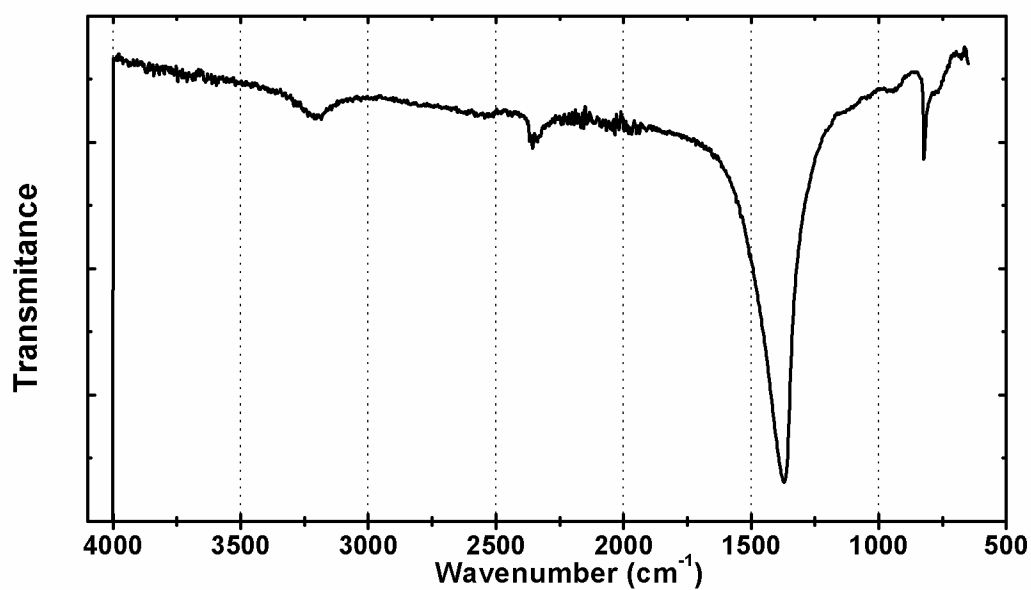

**Figure S4.** FTIR of TGA residue of PMMA grafted BNO.

## GPC

GPC results and traces of neat PMMA as control group and free polymer from grafted BNO are shown below.

|              | Retention Time (min) | Mn (kg/mol) | Mw (kg/mol) | Polydispersity |
|--------------|----------------------|-------------|-------------|----------------|
| Neat PMMA    | 16.28                | 199         | 231         | 1.16           |
| Free polymer | 15.164               | 174         | 439         | 2.52           |

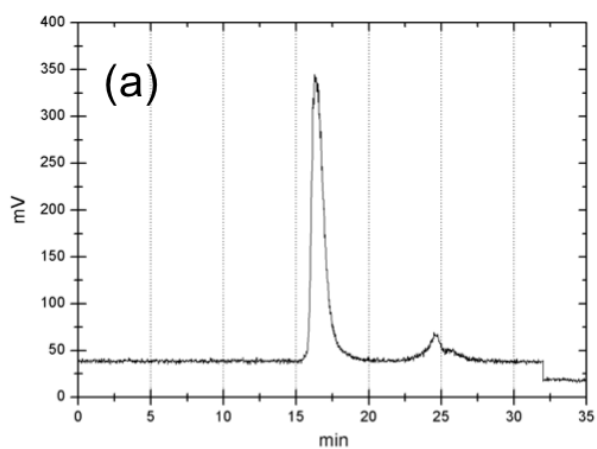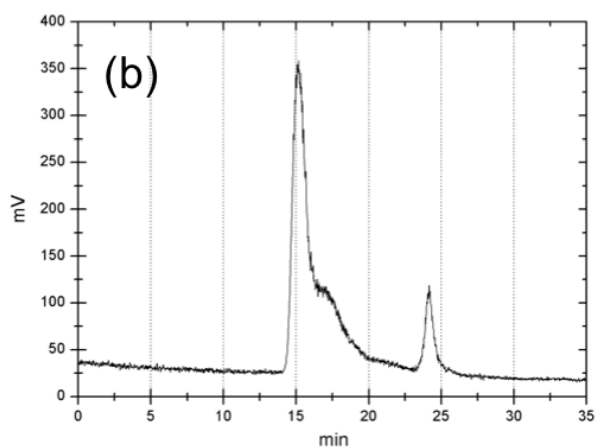

**Figure S5.** GPC of (a) neat PMMA as control and (b) free polymer in the filtrate of product from ATRP reaction

### **FESEM**

To study and compare the morphology of fBNOs and neat polymer, SEM images of neat polymer and fBNOs are shown below.

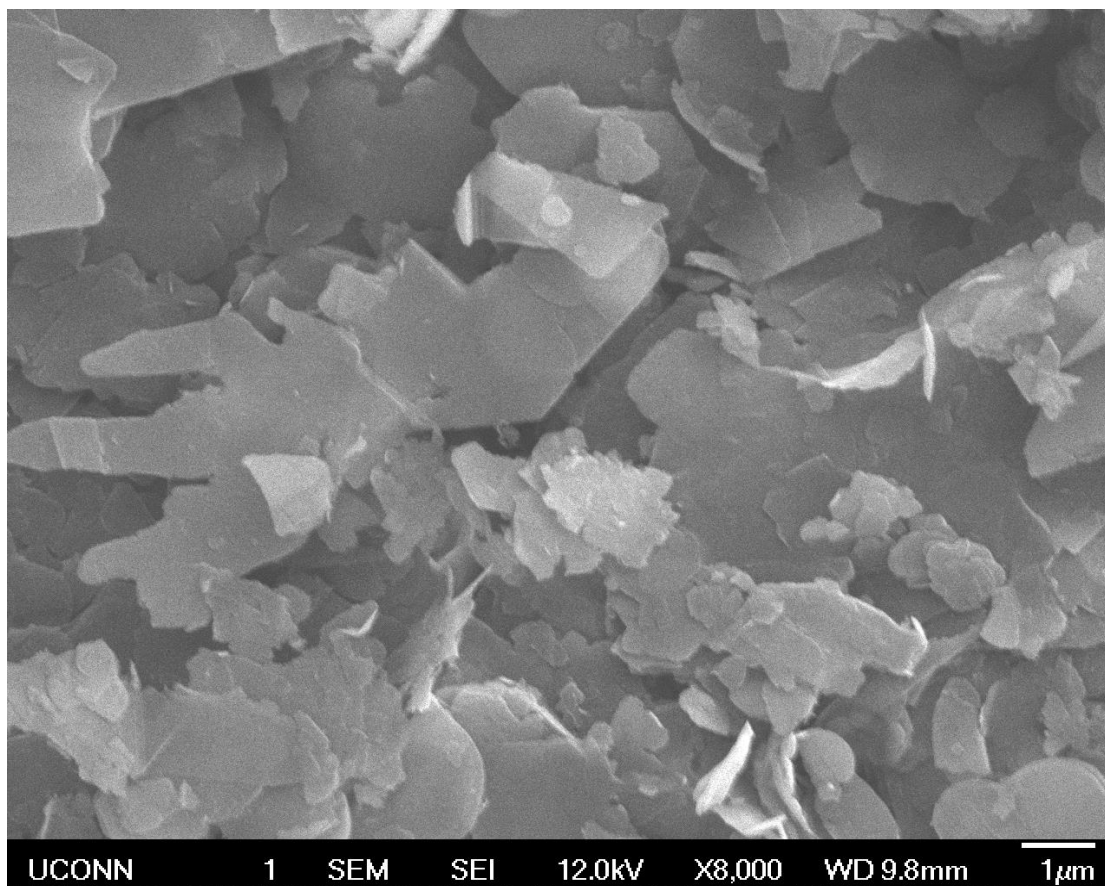

**Figure S6.** SEM of TGA residue of PMMA grafted BNO



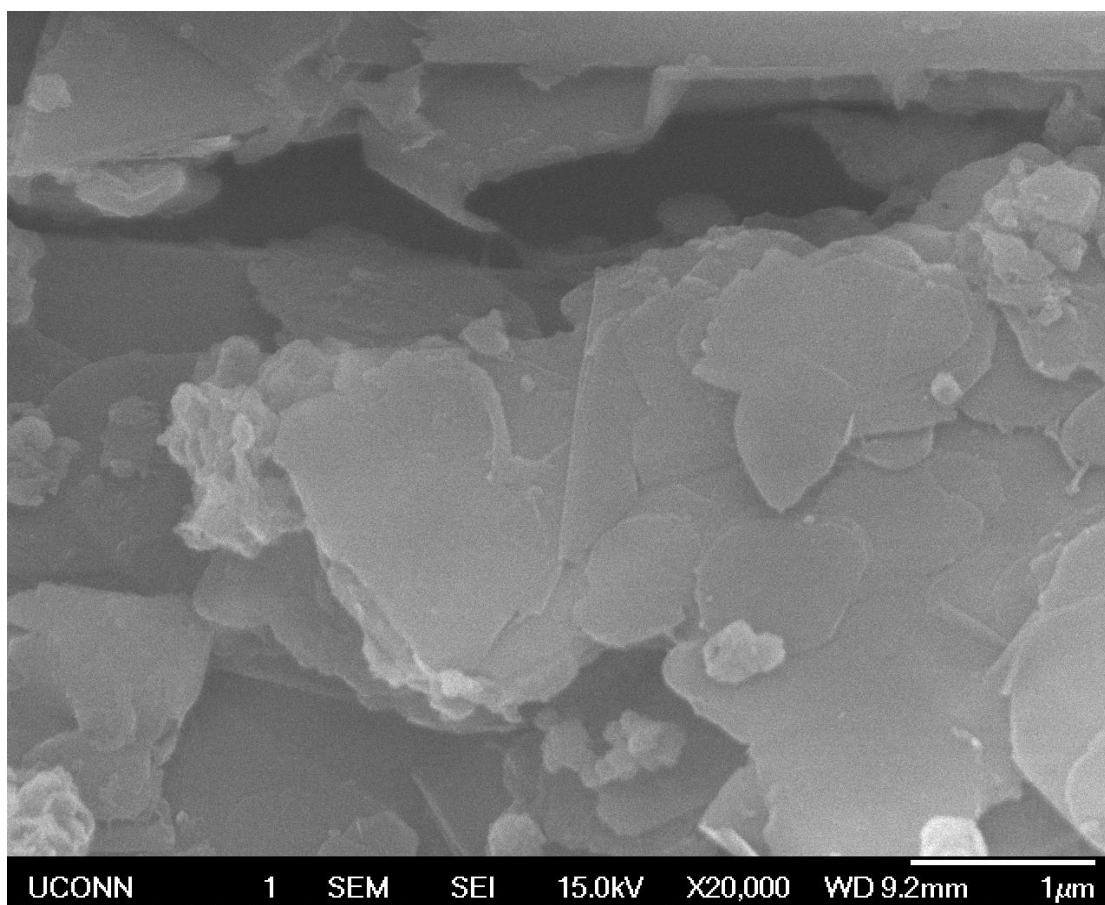

**Figure S7.** SEM of BiBB functionalized BNNS

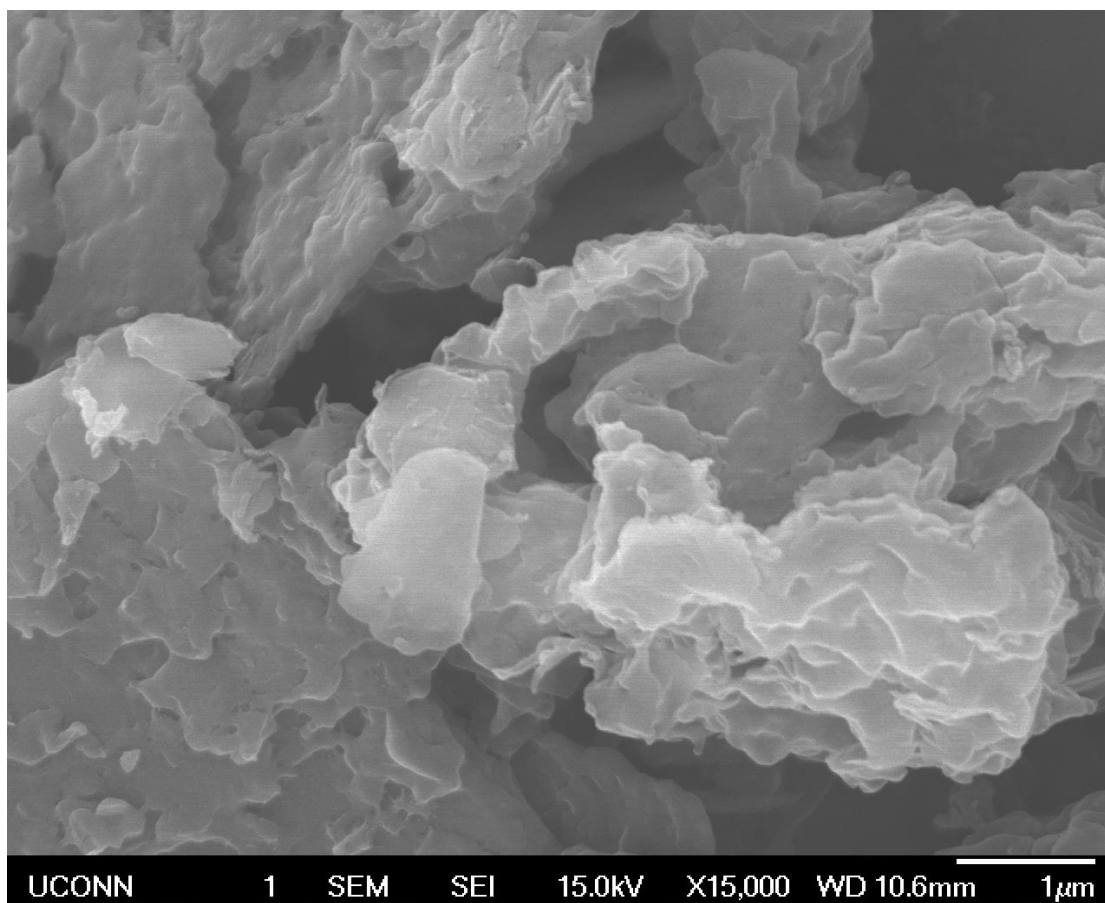

**Figure S8.** Low magnification SEM of PMMA grafted BNO

**Thickness measurement of films in Fig. 4(b)**

Thicknesses of three point of each thin film sample in Fig 4(b) are shown below.

| composites        | Thickness(mm) |         |         |
|-------------------|---------------|---------|---------|
| grafted BNO /PMMA | 0.03695       | 0.04505 | 0.03130 |
| hBN/PMMA          | 0.03255       | 0.03935 | 0.03280 |
